# Supplementary material
Source: PubMed Central journal article supplement (PMC7260019)
Supplement: jci-130-135026-s173.pdf [file jci-130-135026-s173.pdf]

**Supplementary Figures:  
Supplemental Figure 1**

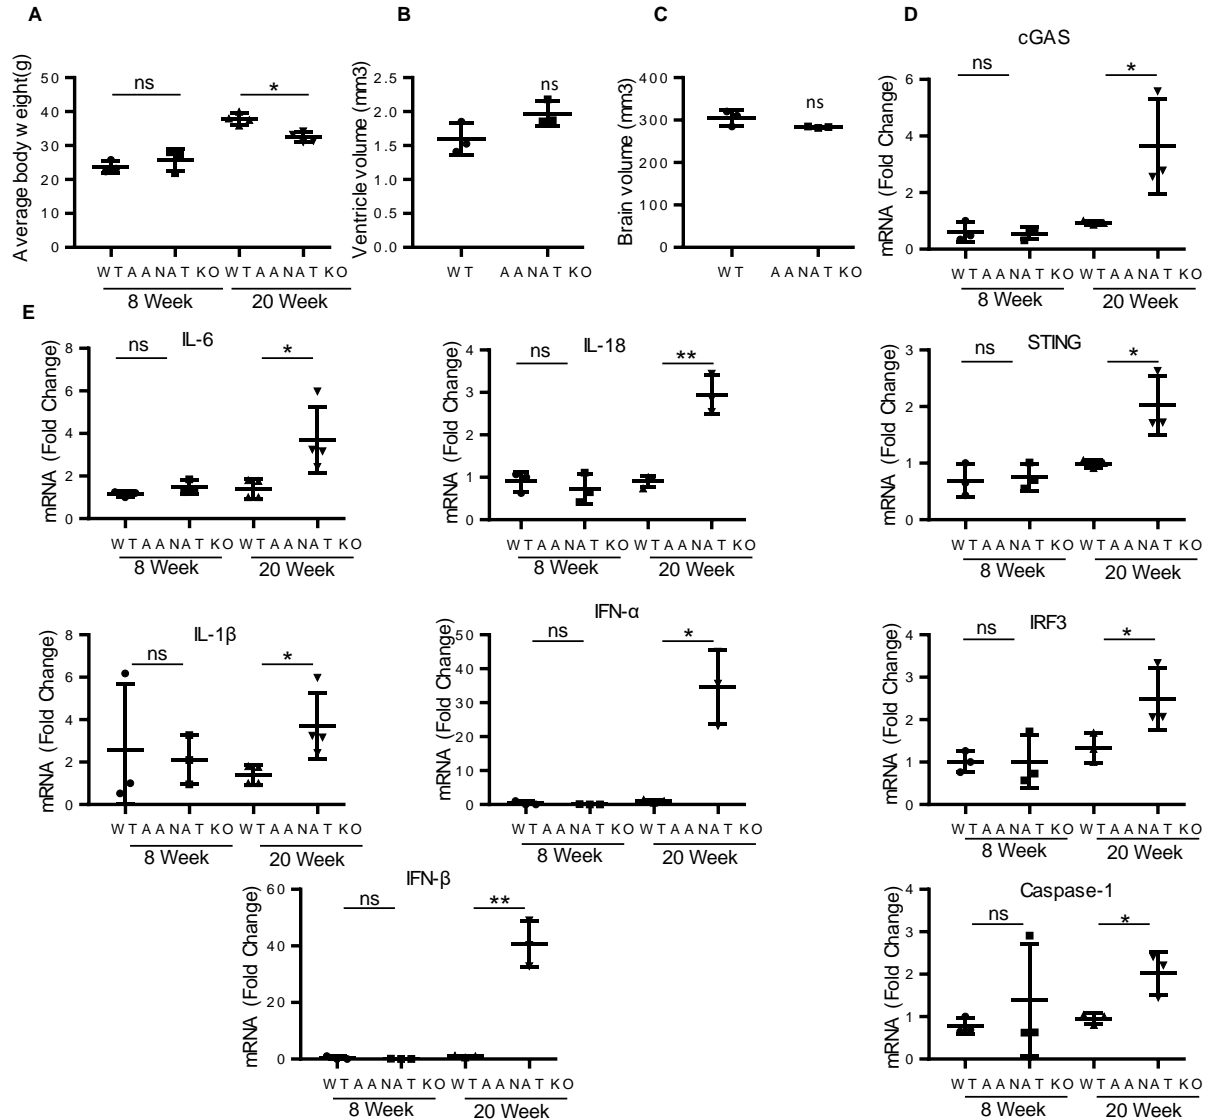

**Supplemental Figure 1. AANAT-KO induces mtDNA mediated inflammation:** (A) Average body weight in WT and AANAT-KO mice (age 8 and 20-week) N=4. (B) ventricle and (C) brain volume in 20-week WT and AANAT KO brain, N=3. (D) qPCR analysis of mRNA of cGAS, STING, IRF3 and caspase-1 in WT and AANAT-KO brain (age 8 and 20-week). MRNA expression is plotted relative to amount in WT brain, after normalization to  $\beta$ -Actin, N=3. (E) qPCR analysis of mRNA of proinflammatory cytokines and interferons in WT and AANAT-KO brain (age 8 and 20-week). MRNA expression is plotted relative to amount in age matched WT brain, after normalization to  $\beta$ -actin, N=3 for 8 week and N=4 for 20 week. Data are shown as mean $\pm$ SD and analyzed by Student's T test (panel B&C) and one way ANOVA (panel A, D & E). \*P<0.05, \*\*P<0.01, ns; Non-significant.

## Supplemental Figure 2

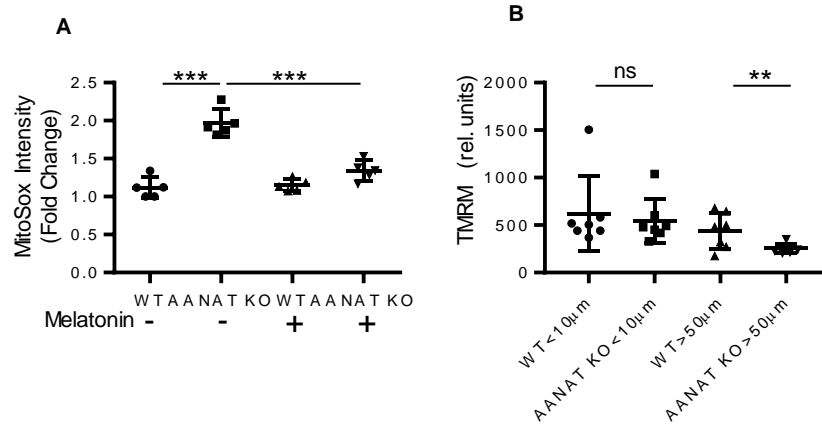

**Supplemental Figure 2. Melatonin regulates mitochondrial dysfunction in PCNs:** (A) Analysis of mitochondrial ROS by MitroSox in WT and AANAT-KO PCN at DIV21 with or without melatonin (5  $\mu$ M) in culture medium. MitroSox fluorescence plotted relative to WT PCN after normalization to nuclear stain N=5. (B) TMRM fluorescence intensity (MMP) dependence on distance between mitochondria and nuclei for WT and AANAT PCN. Data normalized to mtGFP fluorescence intensity expressed as relative units as described (52), N=7. Data are shown as mean $\pm$ SD analyzed by one way ANOVA (Panel A) and student t test (Panel B), \*P<0.05, \*\*P<0.01, \*\*\*P<0.001

Supplemental Figure 3

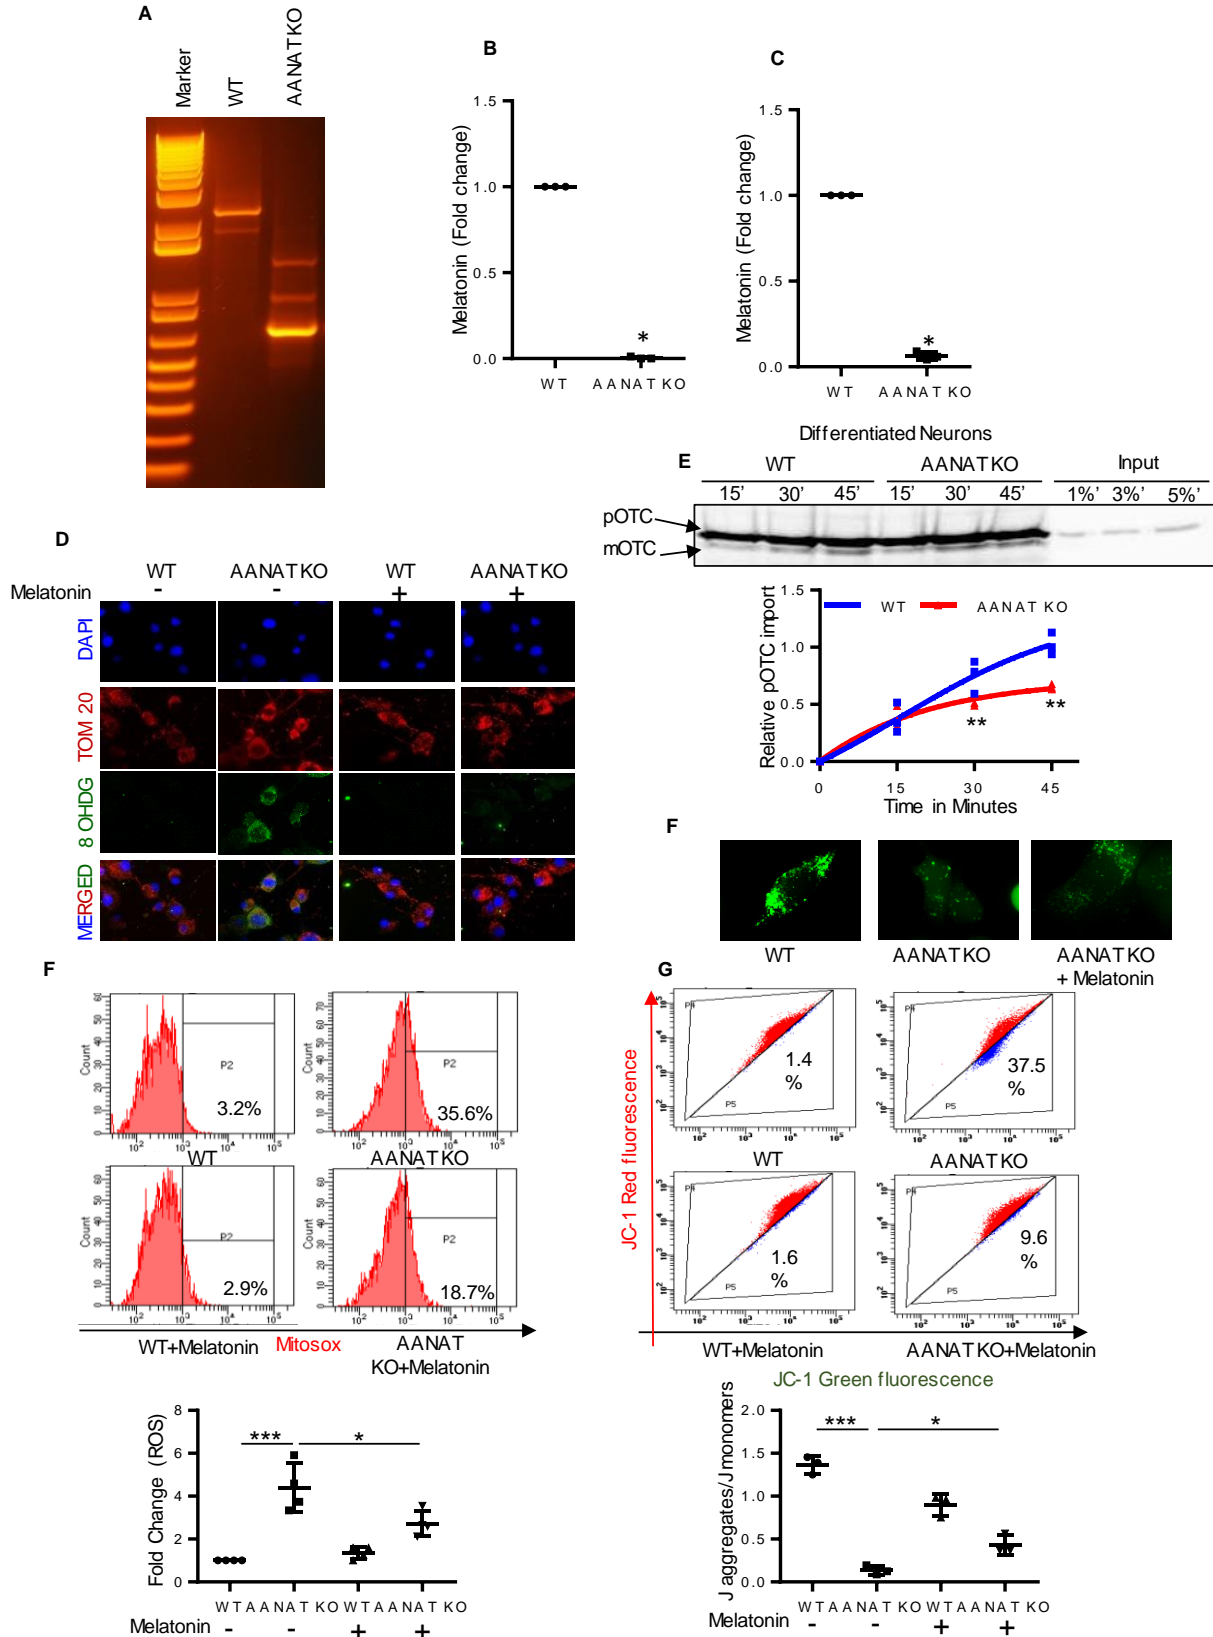

**Supplemental Figure 3. Inhibition of melatonin synthesis alters mitochondrial homeostasis:** (A) Agarose gel electrophoreses of PCR product of AANAT gene in WT and AANAT-KO N2a cells. AANAT-KO N2a cells were created using CRISPR/Cas-9 system as described in our previous study (35). (B) LC-MS quantification of melatonin in cell lysate and (C) mitochondria of WT and AANAT-KO N2a cells, N=3. (D) Representative immunofluorescence image of 8-OHdG, marker of DNA oxidation and TOM20, mitochondrial marker, in differentiated WT and AANAT-KO N2a cells with or without melatonin (5  $\mu$ M) in culture medium, N=5, Scale bar 25 $\mu$ m. (E) Representative image and quantified pre and mature-orthithine transcarbamylase (pOTC and mOTC) protein import assay in mitochondria of differentiated WT and AANAT-KO N2a cells, N=3. Cleavage of pOTC into mOTC occurs in the mitochondrial matrix following import (60). (F) Flow cytometry analysis of Mitosox fluorescence in WT and AANAT-KO differentiated N2a cells with or without melatonin (5  $\mu$ M) in culture medium N=4. (G) Flow cytometry analysis of JC-1 fluorescence in WT and AANAT-KO differentiated N2a cells with or without melatonin (5  $\mu$ M) in culture medium N=3. (H) Representative image of mitochondrial permeability transition pore opening assay in WT and AANAT-KO differentiated N2a cells with or without melatonin (5  $\mu$ M) in culture medium N=3. Data are shown as mean $\pm$ SD analyzed by one sample t test (panel B&C) and by one way ANOVA (panel E-G). \*P<0.05, \*\*P<0.01, \*\*\*P<0.001

**Supplemental Figure 4**

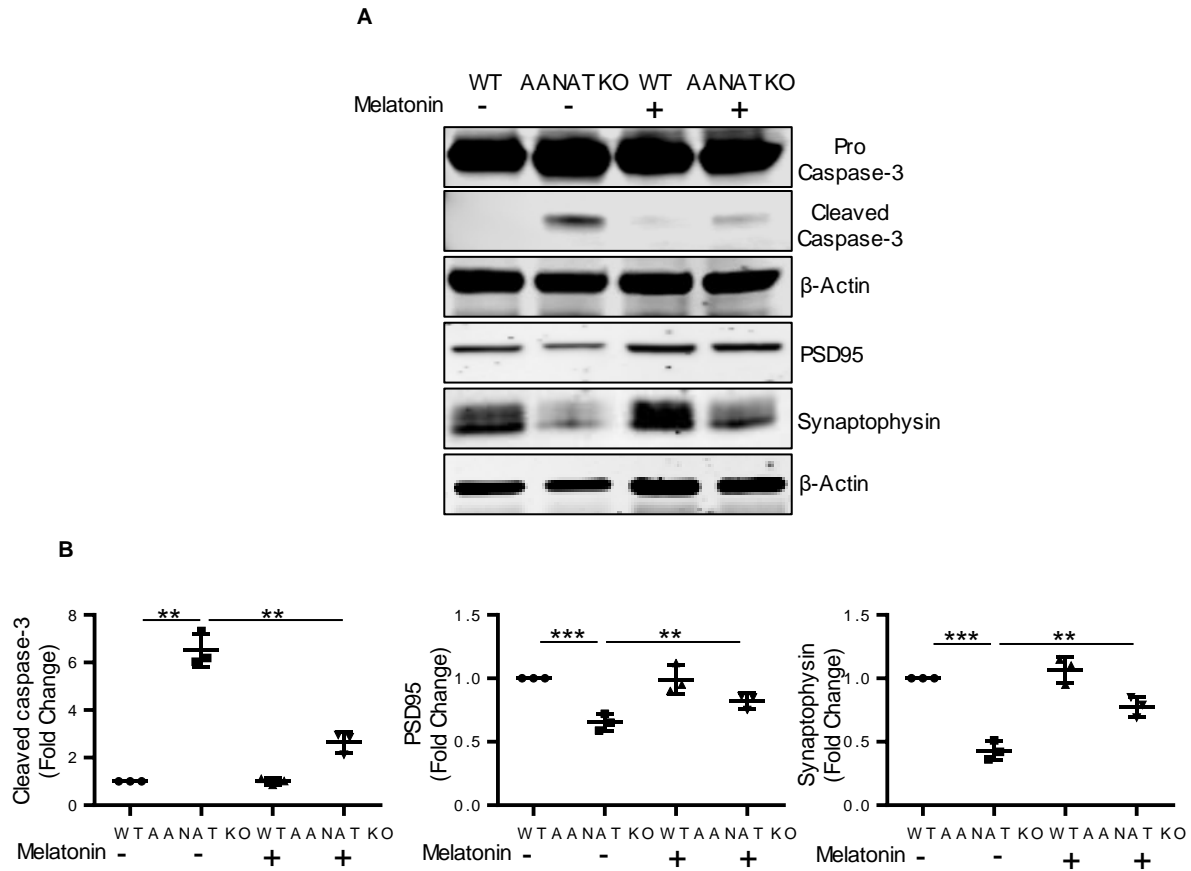

**Supplemental Figure 4. Melatonin regulates mtDNA release and caspase activation in differentiated neurons:** (A) Representative Immunoblots and (B) quantitation for caspase-3, PSD95, synaptophysin and  $\beta$ -actin in total cell lysate of WT and AANAT-KO differentiated N2a cells growing with or without melatonin (5  $\mu$ M) in culture medium.  $\beta$ -Actin was used as a loading control and protein levels are expressed as fold change compared with untreated WT, N=3. Data are shown as mean $\pm$ SD analyzed by one way ANOVA. \*P<0.05, \*\*P<0.01, \*\*\*P<0.001.

**Supplemental Figure 5**

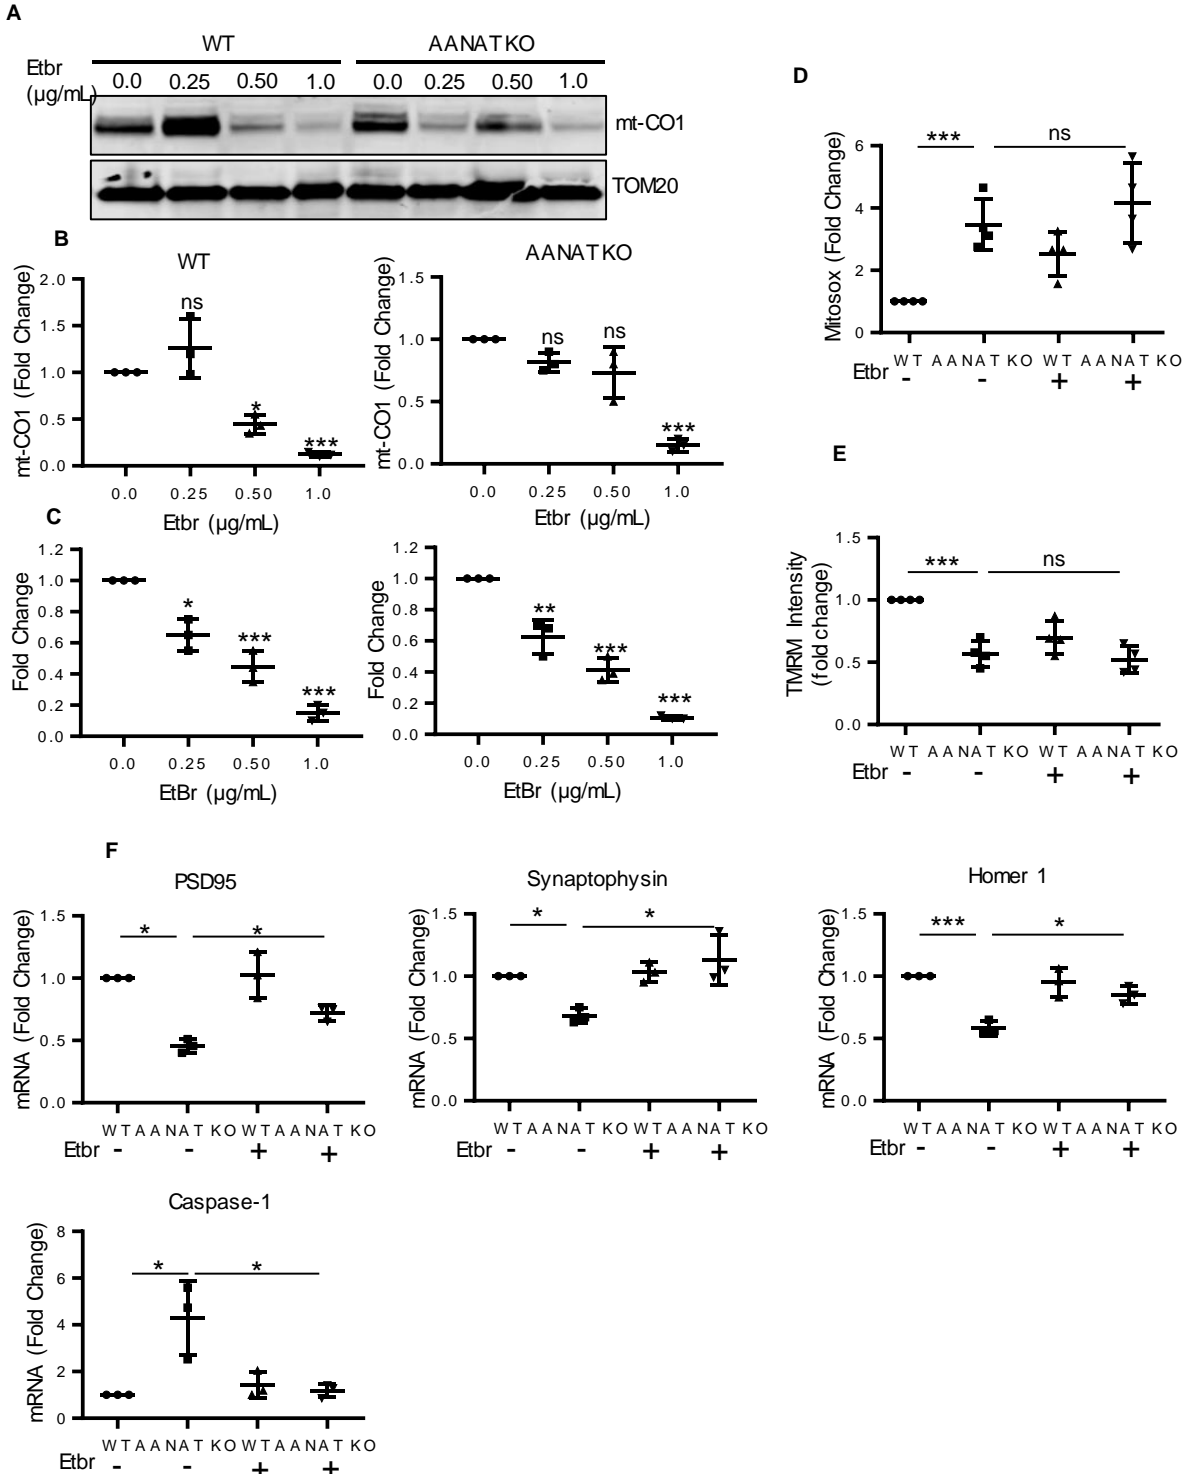

**Supplemental Figure 5. EtBr treatment depletes mtDNA and its encoded proteins in WT and AANAT-KO N2a Cells:**

(A) Representative Immunoblots and (B) quantitation for mt-CO1 and TOM20 in total cell lysate of WT and AANAT-

KO N2a cells exposed with different concentration of EtBr. TOM20 was used as a loading control and protein levels are shown as fold change as compared with untreated for each genotype N=3. (C) qPCR analysis of mitochondrial DNA copy number in WT and AANAT-KO N2a cells exposed with EtBr,  $\beta$ -Actin was used as endogenous control, mtDNA is plotted relative to amount in WT N2a cells after normalization to  $\beta$ -actin N=3. (D) Analysis of mitochondrial ROS by Mitosox in WT and AANAT-KO differentiated N2a cells with or without EtBr (1  $\mu$ g/mL) treatment. Mitosox fluorescence is plotted relative to amount in WT differentiated N2a cells after normalization to nuclear stain, N=3. (E) Analysis of MMP by TMRM in WT and AANAT-KO N2a cells exposed with or without EtBr (1  $\mu$ g/mL). TMRM fluorescence is plotted relative to the amount in WT differentiated N2a cells after normalization to nuclear stain N=3. (F) qPCR analysis for mRNA of PSD95, synaptophysin, homer 1 and caspase-1 in WT and AANAT-KO differentiated N2a cells with or without EtBr treatment (1  $\mu$ g/mL).  $\beta$ -actin was used as endogenous control, and data is plotted relative to amount in WT N2a cells after normalization to  $\beta$ -Actin for each gene, N=3. Data are shown as mean $\pm$ SD analyzed by one way ANOVA, ns; non-significant \*P<0.05, \*\*\*P<0.001.

### Supplemental Figure 6

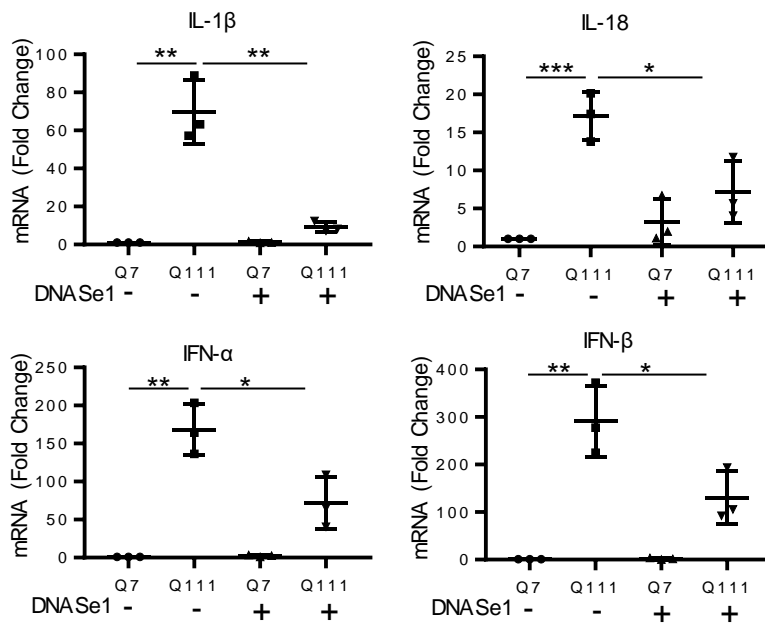

**Supplemental Figure 6. DNase1 degrades mtDNA in HD cells:** qPCR analysis of mRNA of IL-1 $\beta$ , IL-18, IFN- $\alpha$  and IFN- $\beta$  in Q7 and Q111 differentiated cells transfected with or without DNase1.  $\beta$ -actin was used as endogenous control, mRNA expression is plotted relative to amount in LDH-treated Q7 differentiated cells after normalization to  $\beta$ -actin, N=3. Data are shown as mean $\pm$ SD analyzed by one way ANOVA \*P<0.05, \*\*P<0.01, \*\*\*P<0.001.

**Supplemental Figure 7**

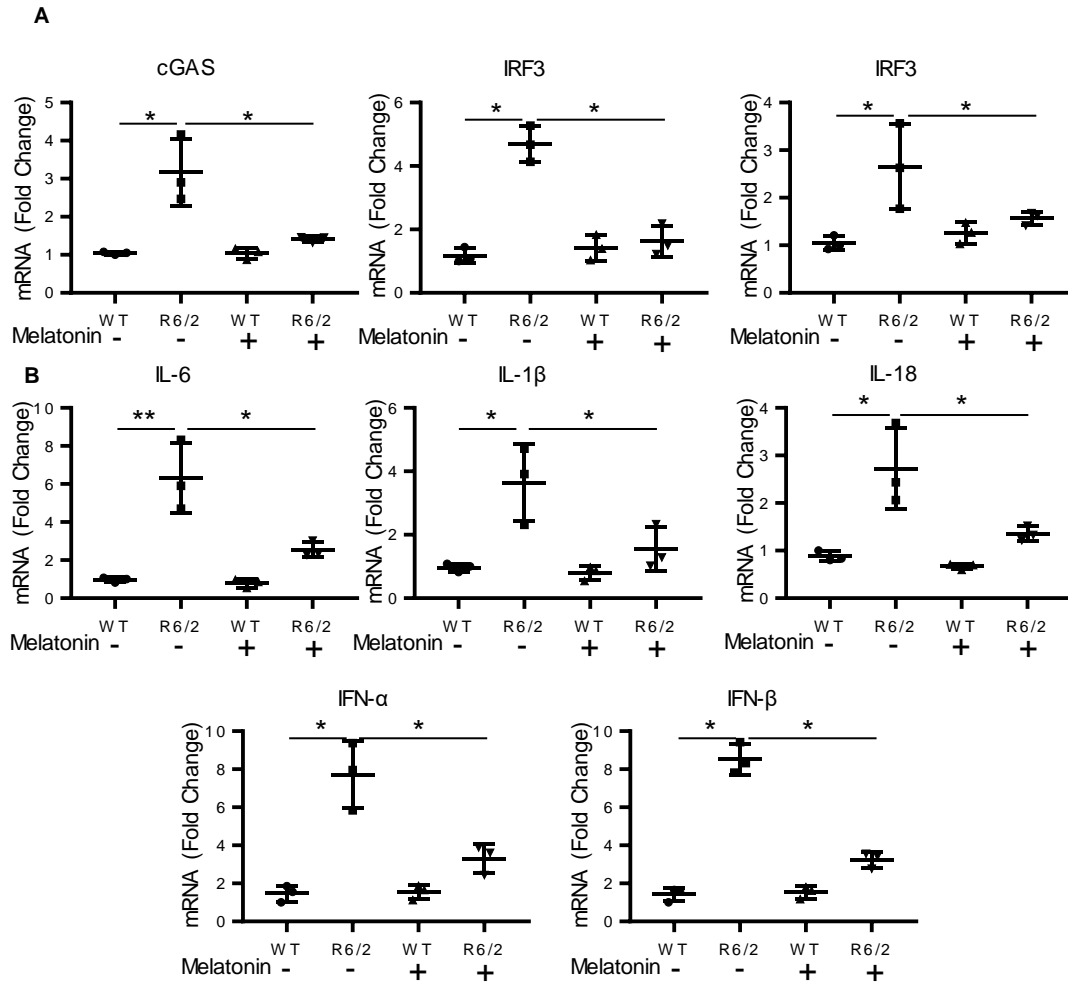

**Supplemental Figure 7. Melatonin regulates mtDNA-mediated inflammation in HD Striatum:** (A) qPCR analysis of mRNA of cGAS, STING, IRF3 in WT and R6/2 striatum with or without melatonin (30 mg/kg) treatment.  $\beta$ -actin was used as endogenous control, the amount of mRNA is presented relative to the amount in vehicle-treated WT striatum after normalization to  $\beta$ -actin, N=3. (B) qPCR analysis of mRNA of IL-6, IL-1 $\beta$ , IL-18, IFN- $\alpha$  and IFN- $\beta$  in WT and R6/2 striatum with or without melatonin (30 mg/kg) treatment.  $\beta$ -actin was used as endogenous control, the amount of mRNA is presented relative to the amount in vehicle-treated WT striatum after normalization to  $\beta$ -Actin N=3. Data are shown as mean $\pm$  SD analyzed by one way ANOVA \*P<0.05, \*\*P<0.01, \*\*\*P<0.001.



**Supplemental Table 1**

| Type    | Grade | Specimen | Age | Gender | CAG repeats | Standard brain block (SBB)(64) | Postmortem interval before frozen |
|---------|-------|----------|-----|--------|-------------|--------------------------------|-----------------------------------|
| Control | n.a.  | T-110    | 62  | M      | N.E.        | SBB7.1                         | N.E.                              |
| Control | n.a.  | T-133    | 33  | F      | N.E.        | SBB7.1                         | 11:25                             |
| Control | n.a.  | T-169    | 69  | M      | N.E.        | SBB6.2                         | 49:20                             |
| Control | n.a.  | T-180    | 52  | F      | N.E.        | SBB7.2                         | 6:07                              |
| Control | n.a.  | T-638    | 78  | M      | N.E.        | SBB7.1                         | 8:00                              |
| Control | n.a.  | T-3925   | 79  | F      | N.E.        | SBB6.1                         | 18:50                             |
| Control | n.a.  | T-5404   | 54  | F      | N.E.        | SBB7.1                         | 16:36                             |
| HD2     | 2     | T-461    | 77  | M      | 41/15       | SBB7.2                         | 19:28                             |
| HD2     | 2     | T-3221   | 58  | M      | 42/15       | SBB7.2                         | 85:11                             |
| HD2     | 2     | T-4394   | 75  | F      | 41/17       | SBB7.2                         | 22:50                             |
| HD2     | 2     | T-4498   | 59  | M      | 43/17       | SBB6.2                         | 32:45                             |
| HD2     | 2     | T-4964   | 89  | M      | 40/17       | SBB6.0                         | 10:35                             |
| HD2     | 2     | T-4989   | 75  | F      | 42/15       | SBB6.1                         | 37:35                             |
| HD2     | 2     | T-5263   | 55  | F      | 54/30       | SBB6.2                         | 30:50                             |

Note: Grade - diagnosed HD grade, Specimen - frozen tissue samples, Age - years at death, F - female, M – male, N.E. - not estimated, n.a. - not applicable, CAG repeats - number of CAG repeats of both alleles.

**Supplemental Table 1: Characteristics of control human samples**

**Supplemental Table 2**

| Antibodies                                                                             | Vendor                    | Detail                             |
|----------------------------------------------------------------------------------------|---------------------------|------------------------------------|
| Mouse monoclonal anti- $\beta$ -Actin                                                  | Millipore-Sigma           | Cat#A5441 RRID:AB_476744           |
| Rabbit monoclonal anti-cGAS                                                            | Cell signaling Technology | Cat#31659 RRID:AB_2799008          |
| Rabbit monoclonal anti-STING                                                           | Cell signaling Technology | Cat#50494 RRID:AB_2799375          |
| Rabbit monoclonal anti-caspase-3                                                       | Cell signaling Technology | Cat#9662S RRID: AB_331439          |
| Mouse monoclonal anti-caspase-9                                                        | Cell signaling Technology | Cat#9508S RRID: AB_2068620         |
| Rabbit monoclonal anti-pNF- $\kappa$ B                                                 | Cell signaling Technology | Cat#3033S RRID: AB_331284          |
| Rabbit polyclonal anti-IRF3                                                            | Proteintech               | Cat#11312-1-AP RRID: AB_2127004    |
| Rabbit polyclonal anti-TOM20                                                           | Proteintech               | Cat#11802-1-AP RRID: AB_2207530    |
| Rabbit polyclonal anti cGAS antibody                                                   | Proteintech               | Cat#26416-1-AP RRID: Not Available |
| Rabbit polyclonal anti-caspase-1                                                       | Santacruz biotechnology   | SC-1218R RRID: AB_630973           |
| Rabbit polyclonal anti-PSD95                                                           | Abcam                     | Cat# ab18258 RRID: AB_444362       |
| Mouse monoclonal anti-Cytochrome C                                                     | Abcam                     | Cat#ab110325 RRID:AB_10864775      |
| Mouse monoclonal anti-mt-CO1                                                           | Abcam                     | Cat# ab14705 RRID:AB_2084810       |
| Mouse monoclonal anti-Synaptophysin                                                    | Santacruz biotechnology   | Cat# sc-17750 RRID: AB_628311      |
| Goat polyclonal anti-BID                                                               | R&D Systems               | Cat# AF860-SP RRID:AB_2065622      |
| Mouse monoclonal anti-8'-OHdG                                                          | Stressmarq Biosciences    | Cat# SMC-155 RRID: AB_889490       |
| Mouse monoclonal anti- $\beta$ III-tubulin                                             | Millipore-Sigma           | Cat#T8660 RRID: AB_477590          |
| Rabbit polyclonal anti-Map2                                                            | Santacruz Biotechnology   | Cat#sc-20172 RRID:AB_2250101       |
| IRDye® 800CW Goat anti-Rabbit IgG Secondary Antibody                                   | LI-COR                    | Cat#925-32211 RRID: AB_2651127     |
| IRDye® 680RD Goat anti-Mouse IgG Secondary Antibody                                    | LI-COR                    | Cat#925-68070 RRID: AB_2651128     |
| IRDye® 800CW Donkey anti-Goat IgG Secondary Antibody                                   | LI-COR                    | Cat#925-32214: RRID: AB_2687553    |
| Donkey anti-Mouse IgG (H+L) Highly Cross-Adsorbed Secondary Antibody, Alexa Fluor 594  |                           | Cat#A-21203 RRID: AB_2535789       |
| Donkey anti-Rabbit IgG (H+L) Highly Cross-Adsorbed Secondary Antibody, Alexa Fluor 488 |                           | Cat#A-21206 RRID: AB_2535792       |

**Supplemental Table 2:** Information of Antibody used in the study.

**Supplemental Table 3**

| Oligonucleotide/Primers sequence |                                     |
|----------------------------------|-------------------------------------|
| mt-CO1                           | FP; 5'-GCCCCAGATATAGCATTCCC-3'      |
|                                  | RP; 5'-GTTCATCCTGTTCTGCTCC-3'       |
| mt-Dloop1                        | FP; 5'-AATCTACCATCCTCCGTGAAACC-3'   |
|                                  | RP; 5'-TCAGTTTAGCTACCCCCAAGTTTAA-3' |
| mt-Dloop3                        | FP; 5'-TCCTCCGTGAAACCAACAA-3'       |
|                                  | RP; 5'-AGCGAGAAGAGGGGCATT-3'        |
| cGAS                             | FP; 5'-ACCGGACAAGCTAAAGAAGGTGCT-3'  |
|                                  | RP; 5'-GCAGCAGGCGTTCCACAACCTTAT-3'  |
| STING                            | FP; 5'-GTCCTCTATAAGTCCCTAAGCATG-3'  |
|                                  | RP; 5'-AAGATCAACCGCAAGTACCC-3'      |
| IRF3                             | FP; 5'-CACAAGGACAAGGACGGAG-3'       |
|                                  | RP; 5'-ATGCAGAACCACAGAGTGTAG-3'     |
| Caspase-1                        | FP; 5'-TCTGTATTCACGCCCTGTTG-3'      |
|                                  | RP; 5'-GATAAATTGCTTCTCTTTGCC-3'     |
| IL-6                             | FP; 5'-CCACTCACCTTTCAGAACG-3'       |
|                                  | RP; 5'-CATCTTTGGAAGGTTTCAGGTTG-3'   |
| IL-1 $\beta$                     | FP; 5'-ACGGACCCAAAAGATGAAG-3'       |
|                                  | RP; 5'-TTCTCCACAGCCACAATGAG-3'      |
| IL-18                            | FP; 5'-GCCTCAAACCTTCCAATCAC-3'      |
|                                  | RP; 5'-GTTGTCTGATTCCAGGTCTCC-3'     |
| IFN- $\alpha$                    | FP; 5'-TCTGTGCTTTCCTGATGGTC-3'      |
|                                  | RP; 5'-GGTTATGAGTCTGAGGAAGGTC-3'    |
| IFN- $\beta$                     | FP; 5'-CAGCCCTCTCCATCAACTATAAG-3'   |
|                                  | RP; 5'-TCTCCGTCATCTCCATAGGG-3'      |
| PSD95                            | FP; 5'-GTGACAACCAAGAAATACCGC-3'     |
|                                  | RF; 5'-TTCACCTGCAACTCATATCCTG-3'    |
| Synaptophysin                    | FP; 5'-AGTGCCCTCAACATCGAAG-3'       |
|                                  | RP; 5'-GCCACGGTGACAAAGAATTC-3'      |
| Homer-1                          | FP; 5'-CAGAGCAAGTTTTTCATTGGGC-3'    |
|                                  | RP; 5'-TGTGTTCCGGTCAATCTGG-3'       |
| $\beta$ -Actin                   | FP; 5'-ACCTTCTACAATGAGCTGCG-3'      |
|                                  | RP; 5'-CTGGATGGCTACGTACATGG-3'      |

**Supplemental Table 3: Sequence of primers used in qPCR**

FP: Forward Primer, RP: Reverse Primer
